# Supplementary material for: Natural Infection of Nyssorhynchus darlingi and Nyssorhynchus benarrochi B with Plasmodium during the Dry Season in the Understudied Low-Transmission Setting of Datem del Marañon Province, Amazonian Peru
Source: PubMed Central journal article supplement (PMC10397451; doi:10.4269/ajtmh.23-0058), 2023-06-26
Supplement: tpmd230058.SD1.pdf [file tpmd230058.SD1.pdf]

## Supplementary Material

Natural infection of *Nyssorhynchus darlingi* and *Nyssorhynchus benarrochi* B with *Plasmodium* during the dry season in the understudied low transmission setting of Datem del Marañon Province, Amazonian Peru

Jan E. Conn,<sup>1,2,\*</sup> Sara A. Bickersmith,<sup>1</sup> Marlon P. Saavedra,<sup>3</sup> Juliana A. Morales,<sup>3</sup> Freddy Alava,<sup>4</sup> Gloria A. Diaz Rodriguez,<sup>5</sup> Clara R. del Aguila Morante,<sup>5</sup> Carlos G. Tong Rios,<sup>5</sup> Carlos Alvarez-Antonio,<sup>6</sup> Jesus M. Daza Huanahui,<sup>7</sup> Joseph M. Vinetz,<sup>3,8,9,10,11</sup> and Dionicia Gamboa.<sup>3,8,11,\*</sup>

**Table S1.** Summary of *Plasmodium*-positive Anophelinae ELISA pools tested by real-time PCR from Datem del Marañon, 2019.

| <b>Locality</b> | <b>Collection Date</b> | <b>HLC Location</b> | <b>Time (h)</b> | <b>Species</b>          | <b>ELISA <i>Plasmodium</i> species</b> |
|-----------------|------------------------|---------------------|-----------------|-------------------------|----------------------------------------|
| Nueva Yarina    | 8/3/2019               | Indoor              | 21:00 – 22:00   | <i>Ny. darlingi</i>     | <i>P. falciparum</i>                   |
| Nueva Yarina    | 8/3/2019               | Outdoor             | 23:00 – 00:00   | <i>Ny. darlingi</i>     | <i>P. falciparum</i>                   |
| Hortencia Cocha | 8/3/2019               | Outdoor             | 18:00 – 19:00   | <i>Ny. darlingi</i>     | <i>P. vivax</i>                        |
| Hortencia Cocha | 8/4/2019               | Outdoor             | 05:00 – 06:00   | <i>Ny. darlingi</i>     | <i>P. falciparum</i>                   |
| Washientza      | 8/6/2019               | Outdoor             | 19:00 – 20:00   | <i>Ny. darlingi</i>     | <i>P. vivax</i>                        |
| Loboyacu        | 8/7/2019               | Outdoor             | 23:00 – 00:00   | <i>Ny. benarrochi</i> B | <i>P. vivax</i>                        |
